# Supplementary material for: A Novel Gene Delivery Vector of Agonistic Anti-Radioprotective 105 Expressed on Cell Membranes Shows Adjuvant Effect for DNA Immunization Against Influenza
Source: PubMed Central journal article supplement (PMC7783388; doi:10.3389/fimmu.2020.606518), 2020-12-22
Supplement: DataSheet_1.pdf [file DataSheet_1.pdf]

## *Supplementary Figures*

# **A Novel Gene Delivery Vector of Agonistic Anti-Radioprotective 105 Expressed on Cell Membranes Shows Adjuvant Effect for DNA Immunization Against Influenza**

Tatsuya Yamazaki<sup>1,4\*</sup>, Mrityunjoy Biswas<sup>1</sup>, Kouyu Kosugi<sup>2</sup>, Maria Nagashima<sup>2</sup>, Masanori Inui<sup>1</sup>, Susumu Tomono<sup>1</sup>, Hidekazu Takagi<sup>1</sup>, Isao Ichimonji<sup>1</sup>, Fumiaki Nagaoka<sup>1</sup>, Akira Aina<sup>3</sup>, Hideki Hasegawa<sup>3</sup>, Joe Chiba<sup>2</sup>, and Sachiko Akashi-Takamura<sup>1\*</sup>

<sup>1</sup>Department of Microbiology and Immunology, School of Medicine, Aichi Medical University, Aichi, Japan

<sup>2</sup>Department of Biological Science and Technology, Tokyo University of Science, Tokyo, Japan

<sup>3</sup>Department of Pathology, National Institute of Infectious Diseases, Tokyo, Japan

### **\*Correspondence:**

Tatsuya Yamazaki

yamazaki13@aichi-med-u.ac.jp

Sachiko Akashi-Takamura

sachiko@aichi-med-u.ac.jp

<sup>4</sup>Lead contact: Tatsuya Yamazaki; E-mail: yamazaki13@aichi-med-u.ac.jp

## Supplementary Figure 1

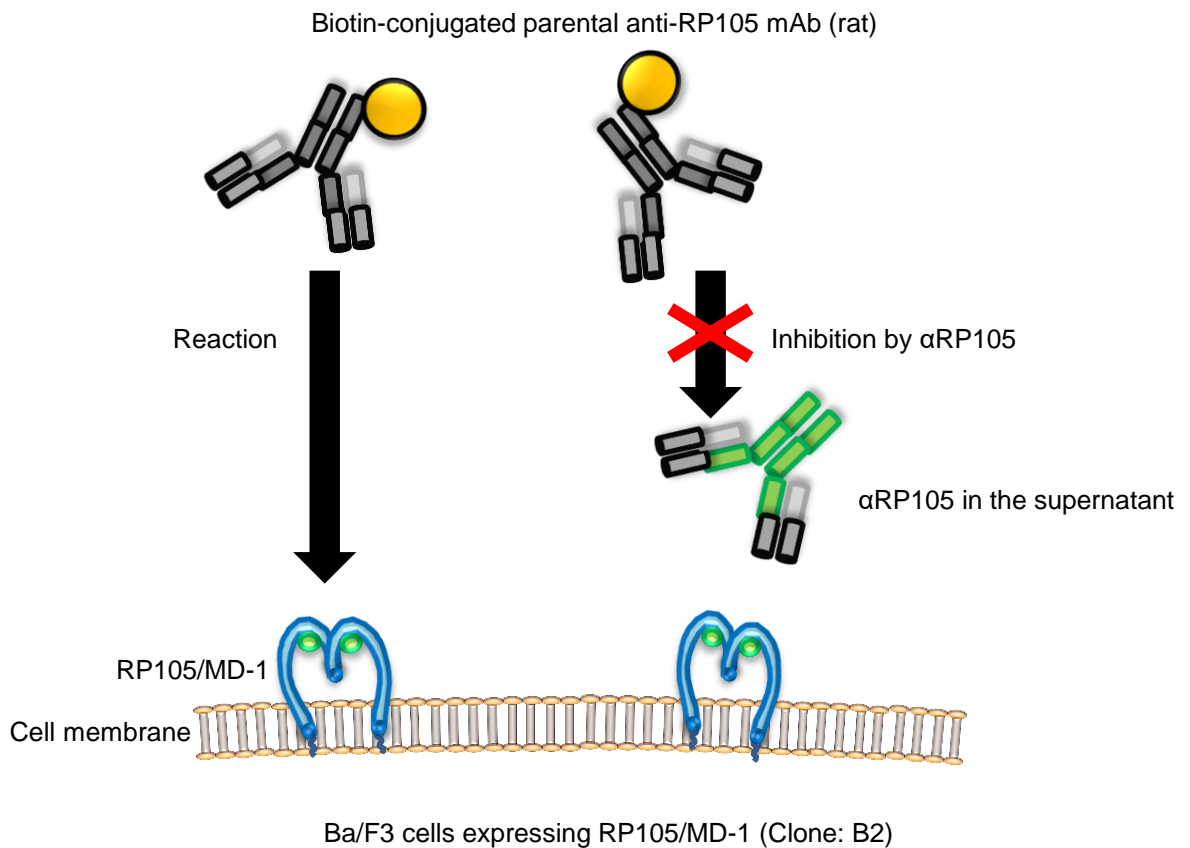

**Supplementary Figure 1| Scheme of the competitive binding assay method.** The Ba/F3 cells expressing RP105/MD-1 (Clone: B2) were incubated with the parental anti-RP105 mAb (rat) or the supernatants obtained from the HEK293T cells, followed by incubation with biotinylated parental anti-RP105 mAb (rat). The binding level was analyzed with geometric mean fluorescence (gMFI) using a BD LSRFortessa.

## Supplementary Figure 2

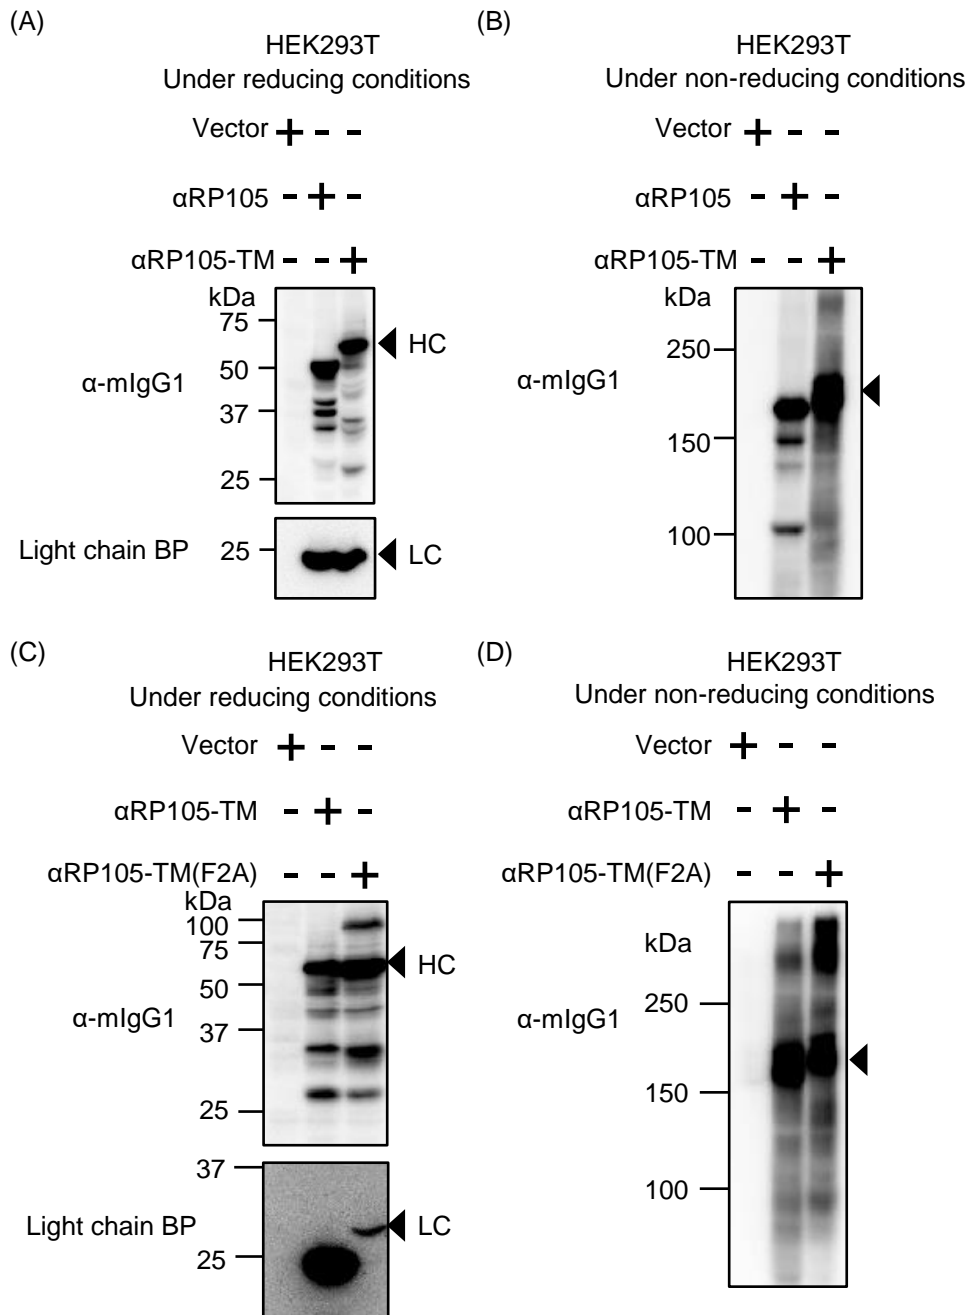

**Supplementary Figure 2** | *In vitro* expression of  $\alpha$ RP105-TM and  $\alpha$ RP105-TM (F2A). (A, B) HEK293T cells were transfected with pCADEST1-empty (Vector), pCADEST1-anti-RP105 mIgG1 and pCADEST1-anti-RP105 mkappa ( $\alpha$ RP105), or pCADEST1-anti-RP105 mIgG1-TM and pCADEST1-anti-RP105 mkappa ( $\alpha$ RP105-TM). Two days later, the cell lysates were collected and processed by western blotting under reducing (A) or non-reducing (B) conditions, followed by probing with HRP-conjugated goat anti-mouse IgG1 and HRP-conjugated light chain-binding protein (BP). (C, D) HEK293T cells were transfected with pCADEST1-empty (Vector), pCADEST1-anti-RP105 mIgG1-TM and pCADEST1-anti-RP105 mkappa ( $\alpha$ RP105-TM), or pCADEST1-anti-RP105 kapp-F2A-anti-RP105 mIgG1-TM [ $\alpha$ RP105-TM (F2A)]. Two days later, the cell lysates were collected and processed by western blotting under reducing (C) or non-reducing (D) conditions, followed by probing with HRP-conjugated goat anti-mouse IgG1 and HRP-conjugated light chain-BP. All indicated data are representative of two independent experiments.

### Supplementary Figure 3

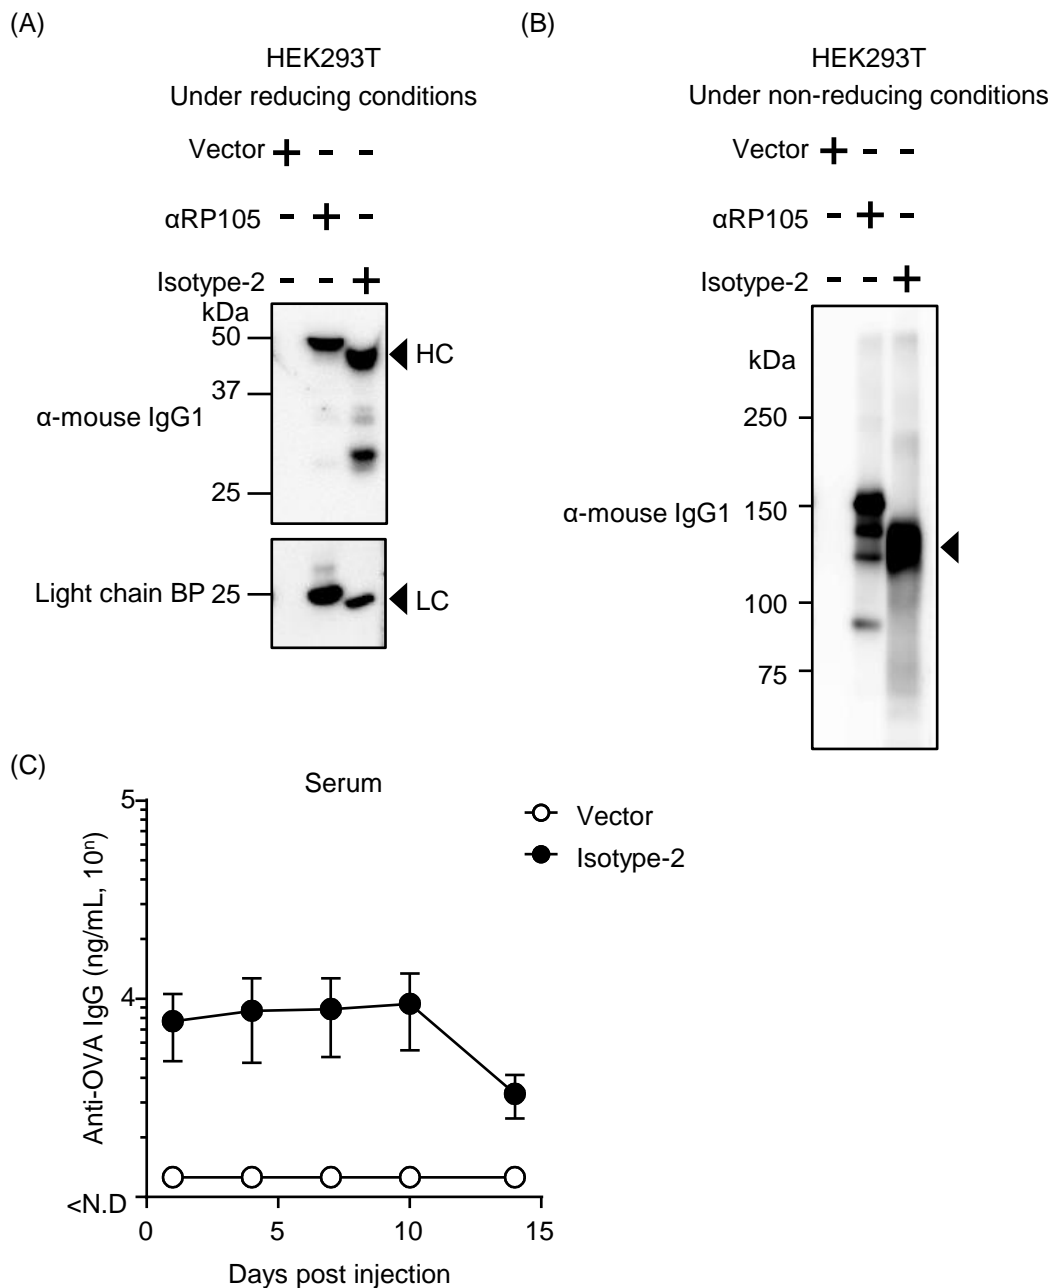

**Supplementary Figure 3| *In vitro* and *in vivo* expression of recombinant anti-OVA mIgG1 (Isotype-2).** (A, B) HEK293T cells were transfected with pCADEST1(Vector), pCADEST1-anti-RP105 mIgG1 and pCADEST1-anti-RP105 mkappa ( $\alpha$ RP105), or pCADEST1-anti-OVA mIgG1 and pCADEST1 anti-OVA mkappa (Isotype-2). Seven days later, the supernatant was obtained and processed by western blotting under reducing (A) or non-reducing (B) conditions, followed by probing with HRP-conjugated goat anti-mouse IgG1 or HRP-conjugated light chain-binding protein (BP). (C) BALB/c mice ( $n = 5$ ) were subjected to HD with the pCADEST1 (Vector) or pCADEST1-anti-OVA mIgG1 and pCADEST1 anti-OVA mkappa (Isotype-2). The serum was obtained at the indicated time, and the level of anti-OVA IgG was analyzed by quantitative ELISA. The detection limit was over 1230 ( $=10^{3.09}$ ) ng/mL. Data are represented as mean  $\pm$  S.D. All indicated data are representative of two independent experiments.

## Supplementary Figure 4

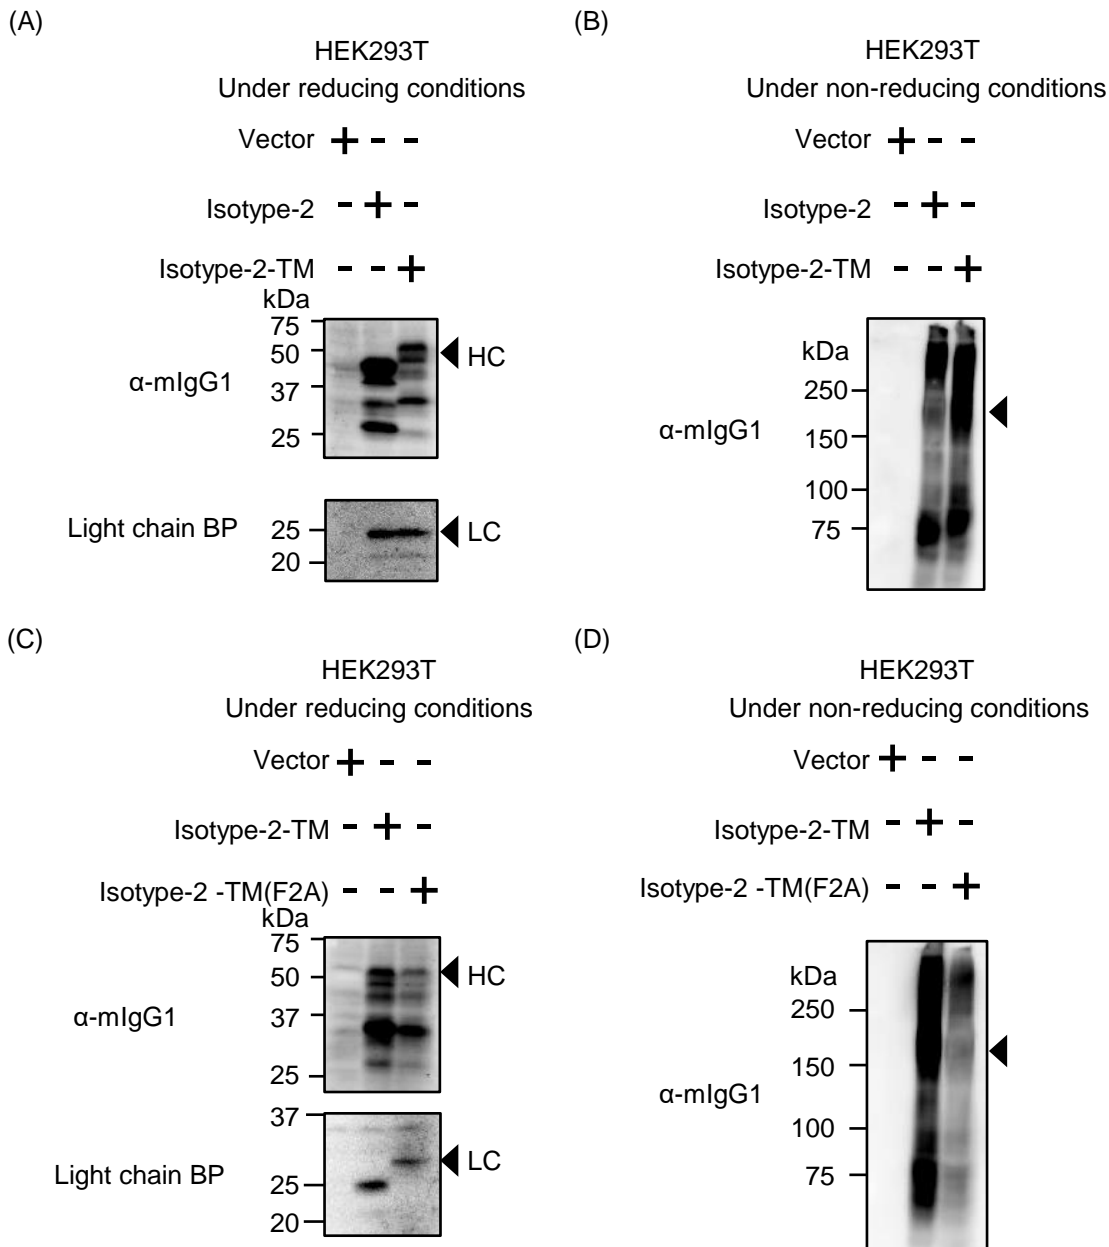

**Supplementary Figure 4| *In vitro* expression of Isotype-2-TM.** (A-D) HEK293T cells were transfected with pCADEST1-empty (Vector), pCADEST1-anti-OVA mIgG1 and pCADEST1-anti-OVA mkappa (Isotype-2), pCADEST1-anti-OVA mIgG1-TM and pCADEST1-anti-OVA mkappa (Isotype-2-TM) (A, B), or pCADEST1-anti-OVA kappa-F2A-anti-OVA mIgG1-TM [Isotype-2-TM (F2A)] (C, D) as indicated. Two days later, cells were lysed with lysis buffer containing 2% SDS and processed by western blotting under reducing (A, C) or non-reducing (B, D) conditions, followed by probing with HRP-conjugated goat anti-mouse IgG1 and HRP-conjugated light chain-binding protein (BP). All indicated data are representative of two independent experiments.

# Supplementary Figure 5

(A)

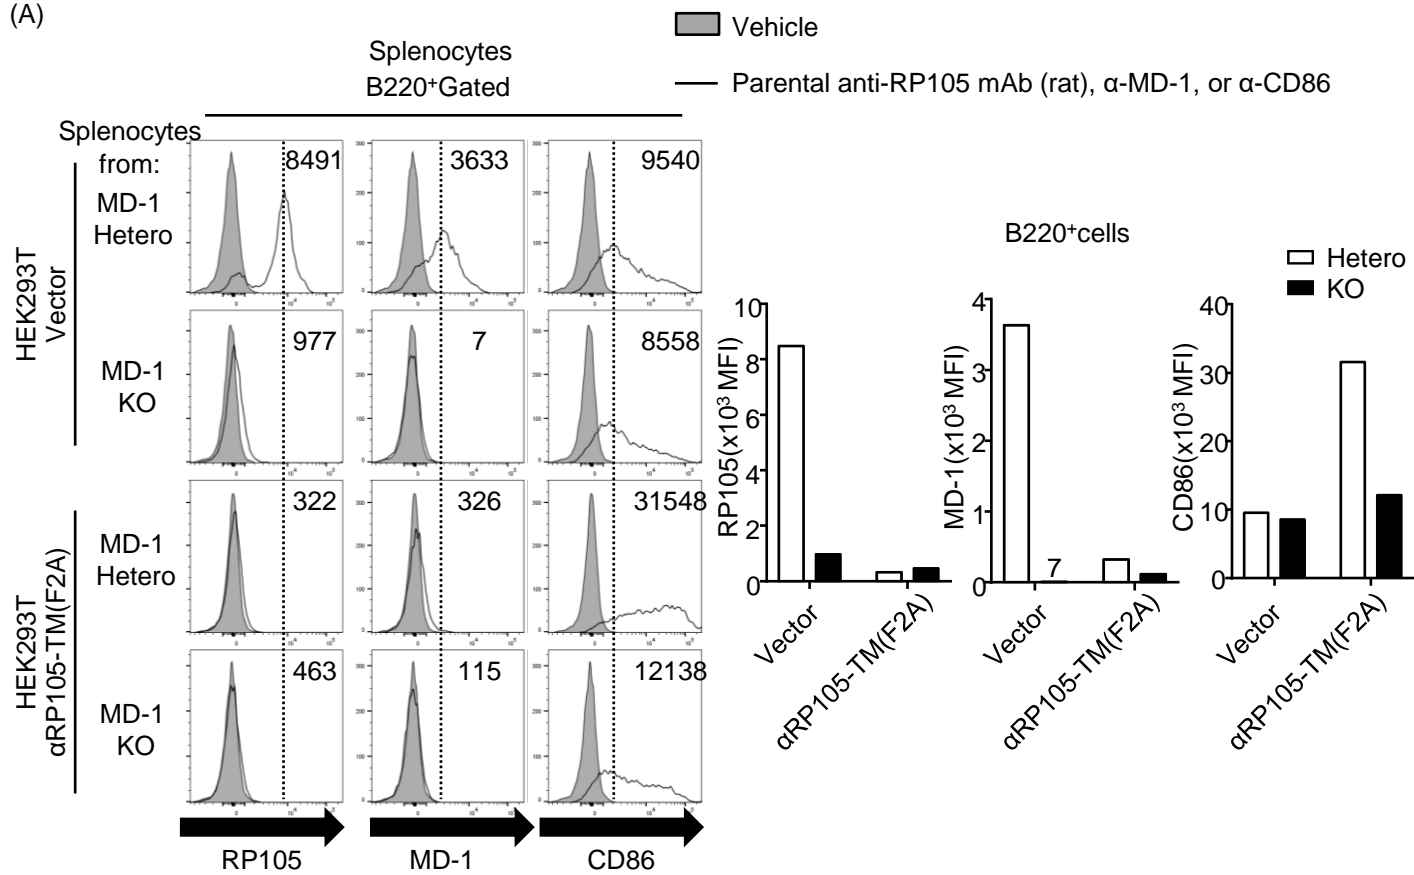

(B)

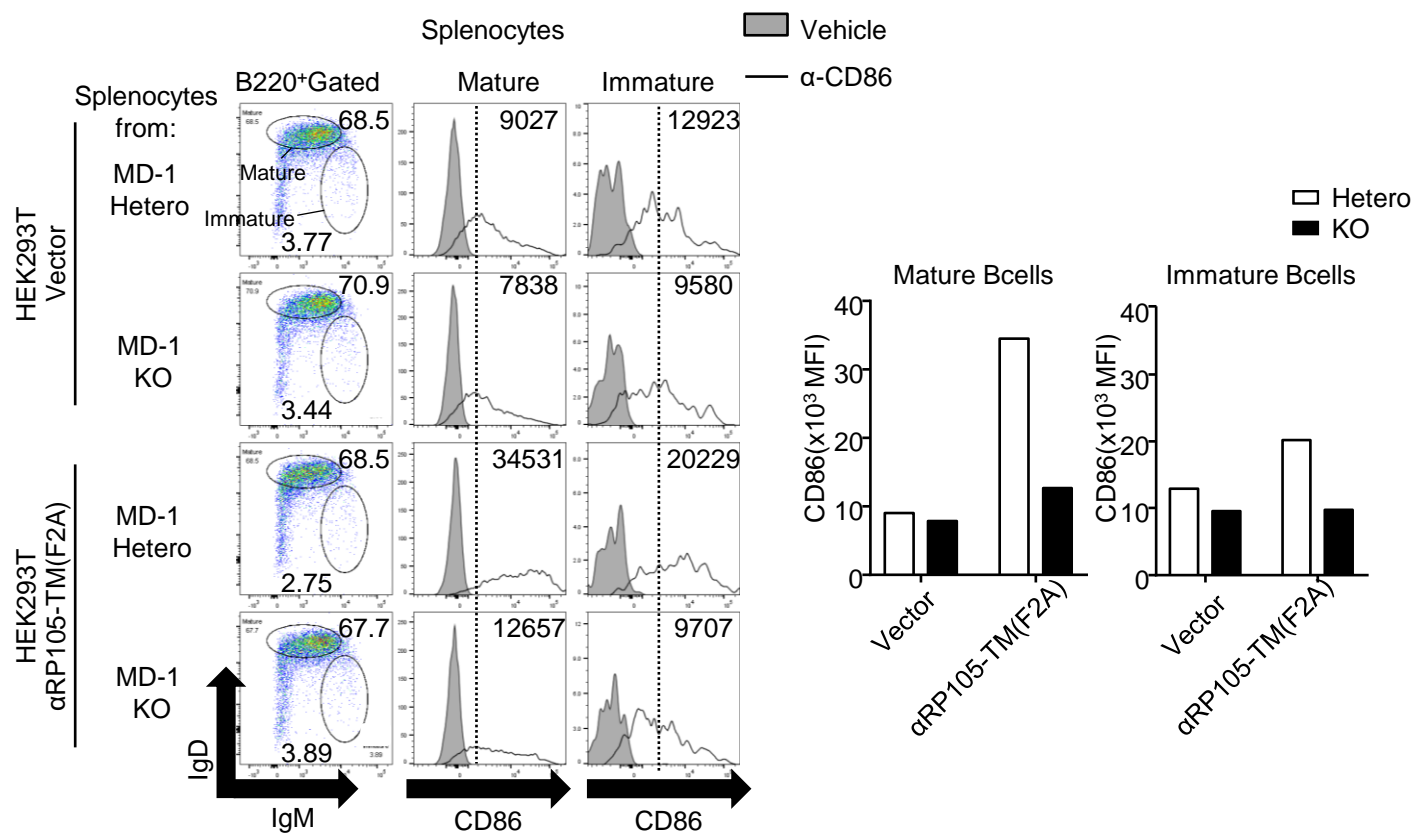

## Supplementary Figure 5

### Supplementary Figure 5| $\alpha$ RP105-TM can activate B cells that depends on RP105

**expression on the cell membrane.** (A, B) HEK293T cells were transfected with pCADEST1-empty (Vector) or pCADEST1-anti-RP105 kappa-F2A-anti-RP105 mIgG1-TM [ $\alpha$ RP105-TM (F2A)]. Two days later, the splenocytes obtained from MD-1-Hetero and MD-1-KO BALB/c mouse were co-cultured with HEK293T cells for two days. Then, the splenocytes, which were gated on B220 (A), IgM<sup>low</sup> IgD<sup>high</sup> as mature B cells (Middle panel in B) or IgM<sup>high</sup> IgD<sup>low</sup> as immature B cells (Right panel in B), were respectively incubated with biotinylated parental anti-RP105 mAb (rat), anti-MD-1, or anti-CD86 antibodies as indicated, followed by incubation with PE-conjugated streptavidin. The indicated numbers on each gate (Left panel in B) respectively represent the percentage of cells of mature or immature B cells gated on B220<sup>+</sup> cells. The numbers in the histogram represent MFI. The expression level was analyzed using a BD LSRFortessa. All indicated data are representative of two independent experiments.

## Supplementary Figure 6

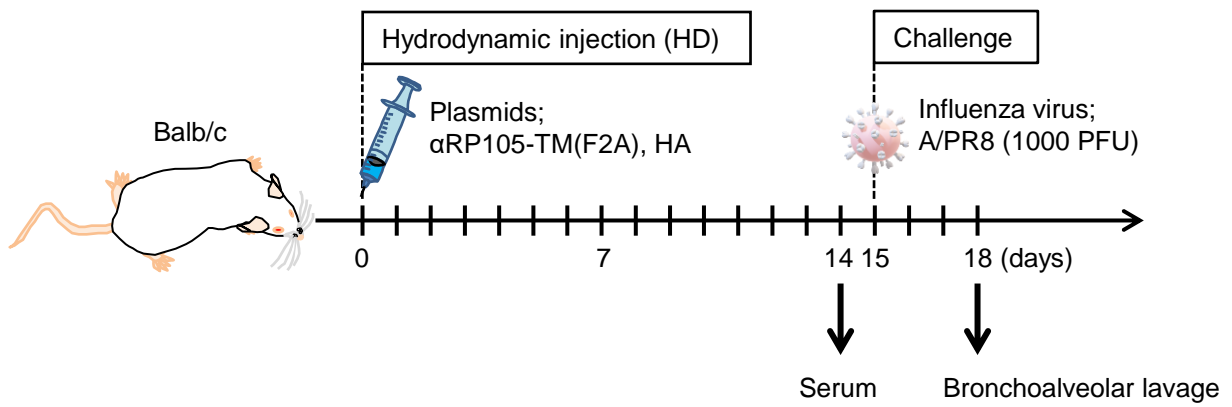

Supplementary Figure 6|The schedule of the immunization and challenge of Figure 9.



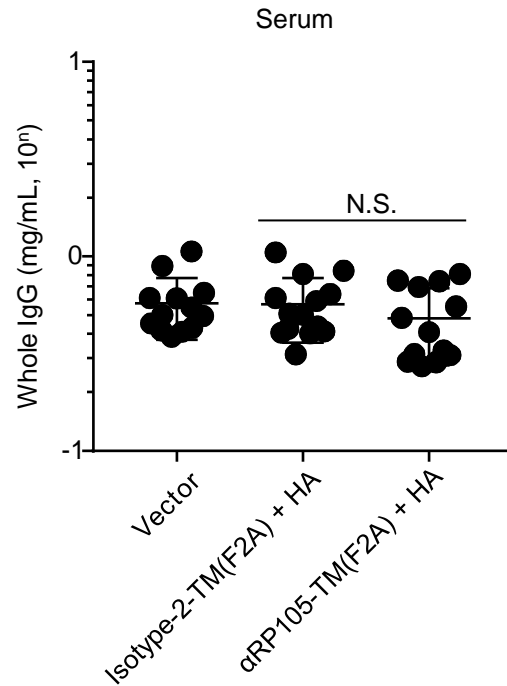

**Supplementary Figure 7 | The whole IgG level is not significantly increased by  $\alpha$ RP105-TM.** Whole IgG levels in the serum from **Figure 9** were analyzed by quantitative ELISA. The detection limit was over 0.0147 ( $=10^{-1.832}$ ) mg/mL. The indicated data are combined from two independent experiments ( $n = 13-14$ ) and indicated as the mean  $\pm$  S.D. N.S., not significant (Mann-Whitney test).

## Supplementary Figure 8

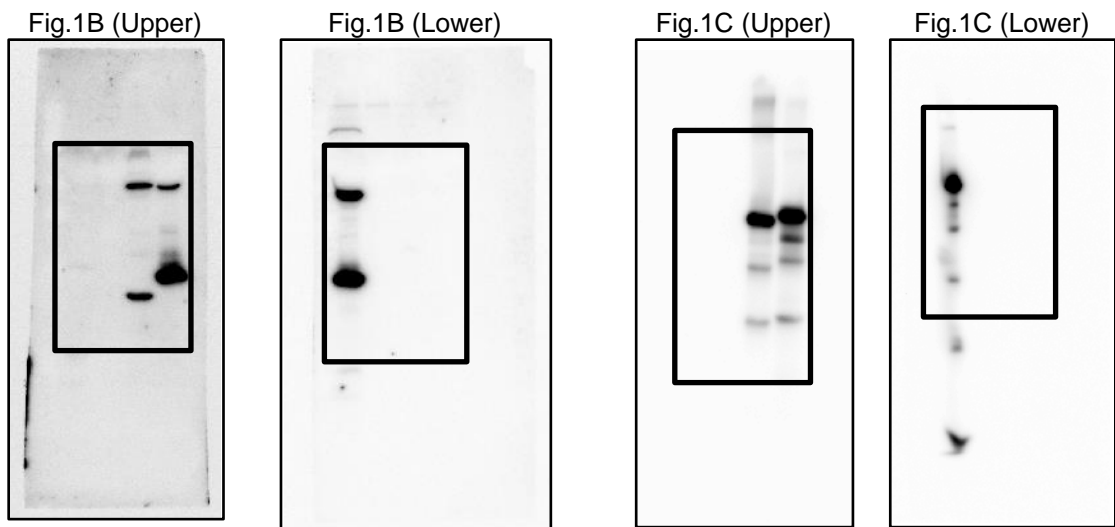

**Supplementary Figure 8| Full-length blots from the primary figures.** The cropped areas used in the current article are indicated in black boxes.

# Supplementary Figure 9

Fig.S2A (Upper) Fig.S2A (Lower)

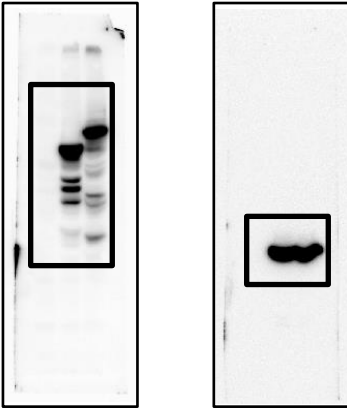

Fig.S2B

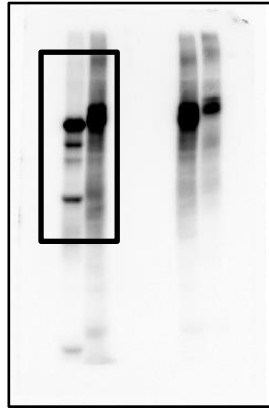

Fig.S2C (Upper)

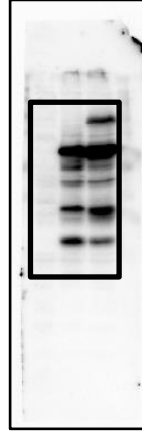

Fig.S2C (Lower)

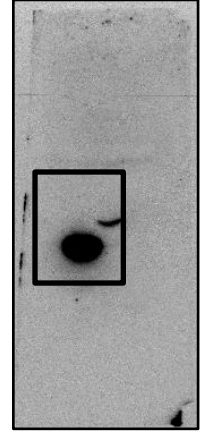

Fig.S2D

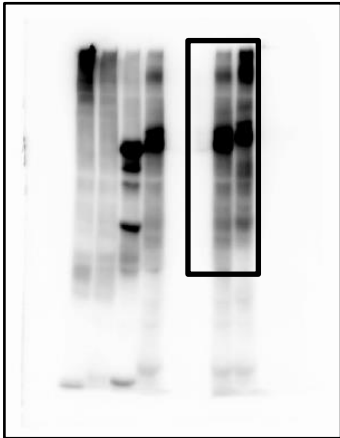

Fig.S3A (Upper)

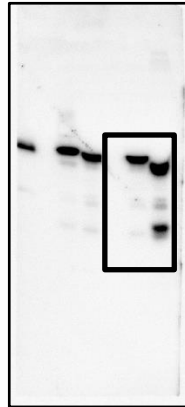

Fig.S3A (Lower)

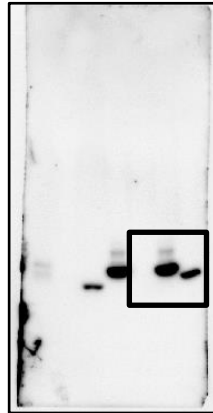

Fig.S3B

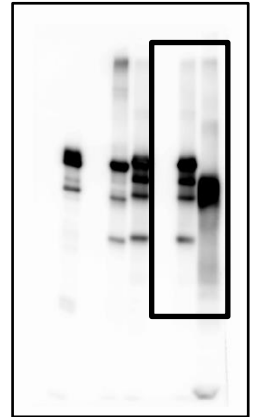

Fig.S4A (Upper)

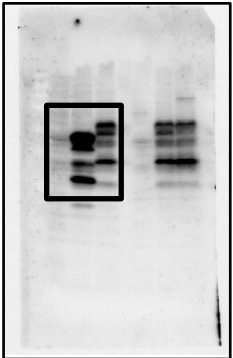

Fig.S4A (Lower)

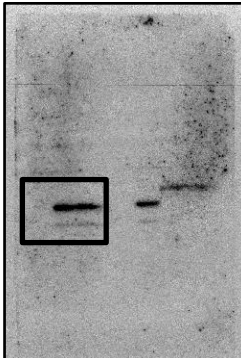

Fig.S4B Fig.S4D

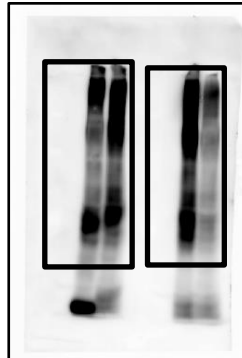

Fig.S4C (Upper)

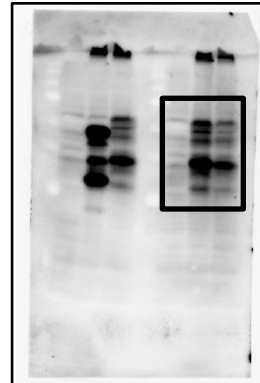

Fig.S4C (Lower)

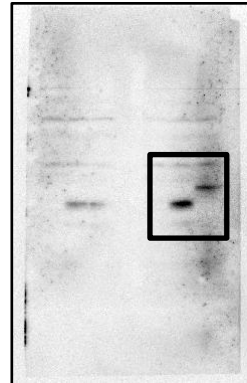

**Supplementary Figure 9 | Full-length blots from the supplementary figures.** The cropped areas used in the current article are indicated in black boxes.

**Supplementary Table 1** | The following primers were used for cloning indicated constructions.

| Primer detail                                             | Primer sequence                                 | Construction               |
|-----------------------------------------------------------|-------------------------------------------------|----------------------------|
| Anti-RP105 V <sub>H</sub> Forward                         | 5'-atGCGGCCGCATGGAAGTGGGTCTTTTTTCC-3'           | pCADEST1-anti-RP105 mIgG1  |
| Mouse IgG1-overlapped anti-RP105 V <sub>H</sub> Reverse   | 5'-GATGGGGGTGTCGTTTTGGCTGTTGTTTCAGCTGAGGAGA-3'  | pCADEST1-anti-RP105 mIgG1  |
| Mouse IgG1 Forward                                        | 5'-GCCAAAACGACACCCCATC-3'                       | pCADEST1-anti-RP105 mIgG1  |
| Mouse IgG1 Reverse                                        | 5'-aGGCGCGCCTCATTACCAGGAGAGTGGG-3'              | pCADEST1-anti-RP105 mIgG1  |
| Anti-RP105 V <sub>L</sub> Forward                         | 5'-aGCGGCCGCATGGAGACAGACAGACTCCT-3'             | pCADEST1-anti-RP105 mkappa |
| Anti-RP105 V <sub>L</sub> Reverse                         | 5'-TTTCAACTCCAGCTTGGTGC-3'                      | pCADEST1-anti-RP105 mkappa |
| Anti-RP105 V <sub>L</sub> -overlapped mouse kappa Forward | 5'-GCACCAAGCTGGAGTTGAAACGGGCTGATGCTGCACCAAC-3'  | pCADEST1-anti-RP105 mkappa |
| Mouse kappa Reverse                                       | 5'-aGGCGCGCCCTAACACTCATTCTGTTGA-3'              | pCADEST1-anti-RP105 mkappa |
| Anti-OVA V <sub>H</sub> Forward                           | 5'-atGCGGCCGCATGGCCGTA CTG GCCTCTT-3'           | pCADEST1-anti-OVA mIgG1    |
| Mouse IgG1-overlapped anti-OVA V <sub>H</sub> Reverse     | 5'-GATGGGGGTGTCGTTTTGGCAGACACTGTGACCAGTG TTC-3' | pCADEST1-anti-OVA mIgG1    |
| A/PR8-HA Forward                                          | 5'-atGCGGCCGCATGAAGGCAAACCTACTGGT-3'            | pCADEST1-HA                |
| A/PR8-HA Reverse                                          | 5'-aGGCGCGCCTCAGATGCATATTCTGCACT-3'             | pCADEST1-HA                |
