# Supplementary material for: A Novel Gene Delivery Vector of Agonistic Anti-Radioprotective 105 Expressed on Cell Membranes Shows Adjuvant Effect for DNA Immunization Against Influenza
Source: PubMed Central journal article supplement (PMC7783388; doi:10.3389/fimmu.2020.606518), 2020-12-22
Supplement: DataSheet_2.pdf [file DataSheet_2.pdf]

## *Supplementary Data*

# **A Novel Gene Delivery Vector of Agonistic Anti-Radioprotective 105 Expressed on Cell Membranes Shows Adjuvant Effect for DNA Immunization Against Influenza**

Tatsuya Yamazaki<sup>1,4\*</sup>, Mrityunjoy Biswas<sup>1</sup>, Kouyu Kosugi<sup>2</sup>, Maria Nagashima<sup>2</sup>, Masanori Inui<sup>1</sup>, Susumu Tomono<sup>1</sup>, Hidekazu Takagi<sup>1</sup>, Isao Ichimonji<sup>1</sup>, Fumiaki Nagaoka<sup>1</sup>, Akira Aina<sup>3</sup>, Hideki Hasegawa<sup>3</sup>, Joe Chiba<sup>2</sup>, and Sachiko Akashi-Takamura<sup>1\*</sup>

<sup>1</sup>Department of Microbiology and Immunology, School of Medicine, Aichi Medical University, Aichi, Japan

<sup>2</sup>Department of Biological Science and Technology, Tokyo University of Science, Tokyo, Japan

<sup>3</sup>Department of Pathology, National Institute of Infectious Diseases, Tokyo, Japan

### **\*Correspondence:**

Tatsuya Yamazaki

yamazaki13@aichi-med-u.ac.jp

Sachiko Akashi-Takamura

sachiko@aichi-med-u.ac.jp

<sup>4</sup>Lead contact: Tatsuya Yamazaki; E-mail: yamazaki13@aichi-med-u.ac.jp

### **Supplementary Data**

We indicate amino acid sequences of  $\alpha$ RP105-TM (F2A), Isotype-2-TM (F2A), and HA (A/PR8). The signal sequence was determined by SignalP-5.0 Server (<http://www.cbs.dtu.dk/services/SignalP/>). The variable region, constant region, and trans membrane part were determined by ImMunoGeneTics (IMGT, <http://www.imgt.org/>).

**Amino acid sequence of  $\alpha$ RP105-TM (F2A)**

METDRLLLWVLLLWVPGSTGDTVLTQSPTLAVSPGERVSISCRASEGVNSYMHWYLQRPG 60  
QQPKLLIYKASNLASGVPARFSGSGSGTDFTLTIDPVEADDTATYFCQQSWNDPRTFGGG 120  
TKLELKRADAAPTVSIFPPSSEQLTSGGASVVCFLNNFYPKDINVKWKIDGSERQNGVLN 180  
SWTDQDSKdstysmsstlTLTKDEYERHNSYTCEATHKTSTSPIVKSFNrNECRAKRAPV 240  
KQTLNFDLLKLAGDVESNPGPRGRMELGLFFLLSVTAEVHSQVQLQQSGAELAKPGSSVK 300  
ISCKASGYTFTTDYISWIKQTTGQGLEYIGYIITAGGGTNYNEKFKGKATLTVDKSSSTA 360  
FMQLSSLTPDDSAVYYCARGRIRTLDFDYWGQGMVTVSSAETTAKTTPPSVYPLAPGSA 420  
AQNSMVTLGCLVKGYFPEPVTVTWNSGSLSSGVHTFPAVLQSDLYTLSSSVTVPSSTWP 480  
SETVTCNVAHPASSTKVDKKIVPRDCGCKPCICTVPEVSSVFIFPKPKDVLTITLTPKV 540  
TCVVVDISKDDPEVQFSWFVDDVEVHTAQTQPREEQFNSTFRSVSELPIMHQDWLNGKEF 600  
KCRVNSAAFPAPIEKTISKTKGRPKAPQVYTIPPPKEQMAKDKVSLTCMITDFFPEDITV 660  
EWQWNGQPAENYKNTQPIMDTDGSYFVYSKLVQKSNWEAGNTFTCSVLHEGLNHHTEK 720  
SLSHSPLQLDETCAEAQDGELDGLWTTITIFISLFLSVCYSAAVTLFKVKWIFSSVVEL 780  
KQTLVPEYKNMIGQAP\*

Dotted line: Signal sequence

Double line (Blue): Variable region ( $V_L$ ), Bold line (Blue): Constant region (mkappa)

Double line (Green): Variable region ( $V_H$ ), Bold line (Green): Constant region (mIgG1)

Shaded characters: F2A sequence

Enclosed character: Trans membrane part

\*: Stop codon

**Amino acid sequence of Isotype-2-TM (F2A)**

MVLMLLLLWVSGTCGDIVMSQSPSSLAVSVGEKVTMSCKSSQSLLFGSNQKNSLAWYQQK 60  
PGQSPKLLIYWASTRESGVPDRFTGSGSGTDFTLTISSVKAEDLAVYYCQYYSYPTFG 120  
GVTKLEIKRADAAPTVSIFPPSSEQLTSGGASVVCFLNNFYPKDINVKWKIDGSERQNGV 180  
LNSWTDQDSKDYMSSTLTLTKDEYERHNSYTCEATHKTSTSPIVKSFNRECRAKRA 240  
PVKQTLNFDLLKLAGDVESNPGPRGRMAVLGLFLCLVTFPSCVLSQVQLKQSGPGLVQPS 300  
QSL SITCTVSGFSLTSYGIHWVRQSPGKGLEWLGVIWTGGNTVYNAAFISRLSITKDNSK 360  
SQVFFKMNSLQATDTAFYYCARNWDYGYDWFAYWGQGLVTVSAKTPPSVYPLAPGSAA 420  
QTNSMVTLGCLVKGYFPEPVTVTWNSGSLSSGVHTFPAVLQSDLYTLSSSVTVPSSTWPS 480  
ETVTCNVAHPASSTKVDKKIVPRDCGCKPCICTVPEVSSVFIKPKPKDVLITITLTPKVT 540  
CVVVDISKDDPEVQFSWFVDDVEVHTAQTQPREEQFNSTFRSVSELPIMHQDWLNGKEFK 600  
CRVNSAAFPAPIEKTISKTKGRPKAPQVYTIKPKQMAKDKVSLTCMITDFFPEDITVE 660  
WQWNGQPAENYKNTQPIMDTDGSYFVYSKLVQKSNWEAGNTFTCSVLHEGLHNHHTEKS 720  
LSHSPLQLDETCAEAQDGLDGLWTTITIFISLFLSVCYSAAVTLFKVVKWIFSSVVELK 780  
QTLVPEYKNMIGQAP\*

Dotted line: Signal sequence

Double line (Blue): Variable region ( $V_L$ ), Bold line (Blue): Constant region (mkappa)

Double line (Green): Variable region ( $V_H$ ), Bold line (Green): Constant region (mIgG1)

Shaded characters: F2A sequence

Enclosed character: Trans membrane part

\*: Stop codon

**Amino acid sequence of HA (A/PR8)**

MKANLLVLLCALAAADADTICIGYHANNSTDTVDTVLEKNVTVTHSVNLLLED SHNGKLCR 60  
 LKGITPLQLGNCNIAGWLLGNPECDPLLPVRSWSYIVETPNSENGICYPGDFIDYEELRE 120  
 QLSSVSSFERFEIFPKESSWPNHNTNKGVTAACSHAGKSSFYRNLLWLTEKEGSYPKLN 180  
 SYVNKKGKEVLVLWGIHHPNSKEQQNLYQENAYVSVVTSNYNRRFTPEIAERPVKVDQ 240  
 AGRMNYWTLKPGDTIIFEANGNLIAPRYAFALSRGFGSGIITSNASMHECNTKCQTPL 300  
 GAINSSLPFQNIHPVTIGECPKYVRSACLRLMVTGLRNIPSIQSRGLFGAIAGFIEGGWTG 360  
 MIDGWYGYHHQNEQSGYAADQKSTQNAINGITNKVNSVIEKMNTQFTAVGKEFNKLEKR 420  
 MENLNKKVDDGFLDIWTYNAELLVLENERTLDFHDSNVKNLYEKVKSQKNNAKEIGNG 480  
 CFEFYHKCDNECMESVRNGTYDYPKYSEESKLNREKVDGVKLESMGIYQILAIYSTVASS 540  
 LVLLVSLGAISFWMCSNGSLQCRICI\*

Dotted line: Signal sequence

\*: Stop codon
